# Supplementary material
Source: publisher figshare collection journal article supplement (https://acs.figshare.com/ndownloader/files/10381746)
Supplement: Supplementary file 1 [file 10381746]

## Supporting Information

### CO<sub>2</sub> Reduction Promoted by Imidazole Supported on a Phosphonium-Type Ionic Liquid-Modified Au Electrode at a Low Overpotential

Go Iijima,<sup>†</sup> Tatsuya Kitagawa,<sup>‡</sup> Akira Katayama,<sup>‡</sup> Tomohiko Inomata,<sup>‡</sup> Hitoshi Yamaguchi,<sup>†</sup> Kazunori Suzuki,<sup>†</sup> Kazuki Hirata,<sup>†</sup> Yoshimasa Hijikata,<sup>†</sup> Miho Ito,<sup>†</sup> and Hideki Masuda<sup>‡\*</sup>

<sup>†</sup> Advanced Research and Innovation Center, DENSO CORPORATION, 500-1 Minamiyama, Komenoki-cho, Nisshin 470-0111, Japan

<sup>‡</sup> Graduate School of Engineering, Nagoya Institute of Technology, Gokiso-cho, Showa, Nagoya 466-8555, Japan

\*Corresponding email: [masuda.hideki@nitech.ac.jp](mailto:masuda.hideki@nitech.ac.jp)

#### Contents

|                                                                                                                                                                                                                                                                                                                                                                                                   |    |
|---------------------------------------------------------------------------------------------------------------------------------------------------------------------------------------------------------------------------------------------------------------------------------------------------------------------------------------------------------------------------------------------------|----|
| <b>Figure S1.</b> Characterization of IL, (a) <sup>1</sup> H-NMR and (b) FT-IR spectra.                                                                                                                                                                                                                                                                                                           | S3 |
| <b>Figure S2.</b> Electrochemical desorption of IL modified on the Au(111) electrode.                                                                                                                                                                                                                                                                                                             | S4 |
| <b>Figure S3.</b> FT-IR spectrum of <b>imidazole@IL/Au</b> by RAS measurement.                                                                                                                                                                                                                                                                                                                    | S4 |
| <b>Figure S4.</b> XPS analysis of <b>imidazole@IL/Au</b> . (a) Wide range spectrum as measured at -120 °C, (b) spectrum in the range of 390 - 408 eV as measured at -120 °C, (c) spectrum in the range of 390 - 408 eV as measured at room temperature, (d) spectrum in the range of 124 - 140eV as measured at -120 °C, (e) peak intensity ratio of N1s to P2p as performed at each temperature. | S5 |
| <b>Figure S5.</b> CV measurements of <b>IL/imidazole/Au</b> under (a) Ar and (b) CO <sub>2</sub> at various sweep rates.                                                                                                                                                                                                                                                                          | S6 |
| <b>Figure S6.</b> CV measurements of the <b>ANH@IL/Au</b> systems containing (a) 2-methylimidazole, (b) 1-methylimidazole, (c) 1,2-dimethylimidazole and (d) imidazole as ANH, as measured with a sweep rate of 10 mV/sec.                                                                                                                                                                        | S7 |
| <b>Figure S7.</b> Current efficiencies of formate, methanol and CO produced using several different <b>ANH@IL/Au</b> electrodes (imidazole, 1-methylimidazole, 2-methylimidazole and 1,2-dimethylimidazole as ANH) as measured at -0.8 V vs. Ag/AgCl.                                                                                                                                             | S8 |
| <b>Figure S8.</b> Current efficiencies of formate, methanol and CO produced using the <b>imidazole@IL/Au</b> electrode as measured at various electrochemical potentials.                                                                                                                                                                                                                         | S8 |
| <b>Figure S9.</b> GC-MS spectra of (a) <sup>12</sup> CH <sub>3</sub> OH and (b) <sup>13</sup> CH <sub>3</sub> OH as analyzed at a retention time of 7 minutes performed at -0.8 V vs. Ag/AgCl under CO <sub>2</sub> or <sup>13</sup> CO <sub>2</sub> , respectively. (c), (d) and                                                                                                                 |    |

- (e) are GC-MS spectra performed using IL/Au electrode, homogeneous system of imidazole at  $-0.8$  V vs. Ag/AgCl or using **imidazole@IL/Au** electrode at  $-0.4$  V vs. Ag/AgCl under  $\text{CO}_2$ . All spectra obtained from (c), (d) and (e) did not give any peaks derived from  $\text{CH}_3\text{OH}$  as analyzed at a retention time of 7 minutes (other peaks of (c), (d) and (e) are attributed to contamination from instruments). S9
- Figure S10.** (a) Current density vs. time of **imidazole@IL/Au** under  $\text{CO}_2$  at  $-0.8$  V vs. Ag/AgCl, (b) CV measurement of **imidazole@IL/Au** under  $\text{CO}_2$  before and after electrolysis and (c) XPS analysis of **imidazole@IL/Au** after electrolysis, in the range of 390 - 408 eV as measured at  $-120$  °C. S10
- Figure S11.** Potential dependent *in-situ* ATR-SEIRAS (a) at  $-0.8$  V using the bare Au electrode under  $\text{CO}_2$  in  $\text{D}_2\text{O}$  solutions containing imidazole- $\text{d}_4$  (brown) and imidazole (red), (b) using the IL/Au electrode in 0.1 M  $\text{NaClO}_4$  under Ar (blue) and  $\text{CO}_2$  (red), (c) using the IL/Au electrode under Ar in the range of  $2775 - 3000\text{ cm}^{-1}$ . S11
- Figure S12.** SEIRAS spectra coupled with constant potential electrolysis ( $-0.4\text{V}$ ,  $-0.6\text{V}$ ,  $-0.8\text{V}$ ) at 600 sec. (a) using the IL/Au electrode in 0.1 M  $\text{NaClO}_4$   $\text{D}_2\text{O}$  solution under  $\text{CO}_2$ , (b) using the bare Au electrode in 0.1 M  $\text{NaClO}_4$   $\text{D}_2\text{O}$  solution containing 0.01 M imidazole under  $\text{CO}_2$ , and (c) wide range spectra ( $1200\text{-}3200\text{cm}^{-1}$ ) using the **imidazole@IL/Au** electrode in 0.1 M  $\text{NaClO}_4$   $\text{D}_2\text{O}$  solution under  $\text{CO}_2$ . S12
- Figure S13.** Cyclic voltammogram measured with SEIRAS for Au film prepared on a Si ATR prism in 0.1 M  $\text{H}_2\text{SO}_4$  aqueous solution. Scan rate is  $20\text{ mV s}^{-1}$ . Active surface area was calculated by integrating the charge of Au oxide reduction peak with a theoretical value of  $444\text{ }\mu\text{C/cm}^2$  required for reducing a monolayer of Au oxide. The roughness factor of Au film employed for SEIRAS measurement was estimated as 4.18. S13
- Scheme S1.** Possible CO adsorption sites on Au, (a) atop and (b) 2-fold bridge S14
- Scheme S2.** Synthetic scheme of the ionic liquid containing the disulfide group, **IL**. S14
- Scheme S3.** Preparation of the prism for SEIRAS measurements. S15

(a)

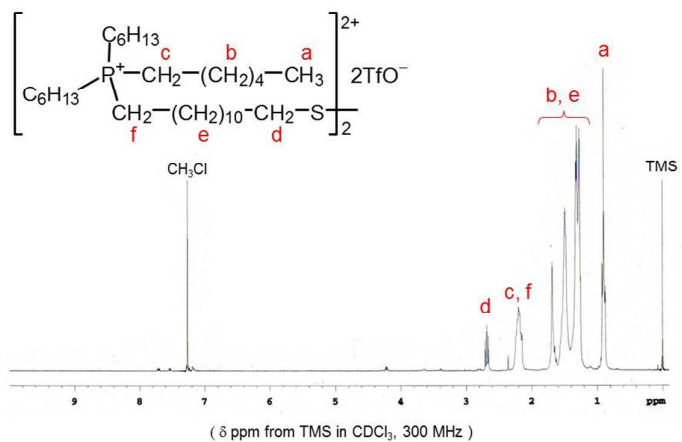

| peak | chemical shift                          |
|------|-----------------------------------------|
| a    | 0.90 (m, 9H, $\text{CH}_3$ )            |
| b, e | 1.25-1.69 (m, 88H, $-\text{CH}_2-$ )    |
| c, f | 2.20 (m, 8H, $\text{P}^+\text{CH}_2-$ ) |
| d    | 2.69 (t, 4H, $\text{SCH}_2-$ )          |

(b)

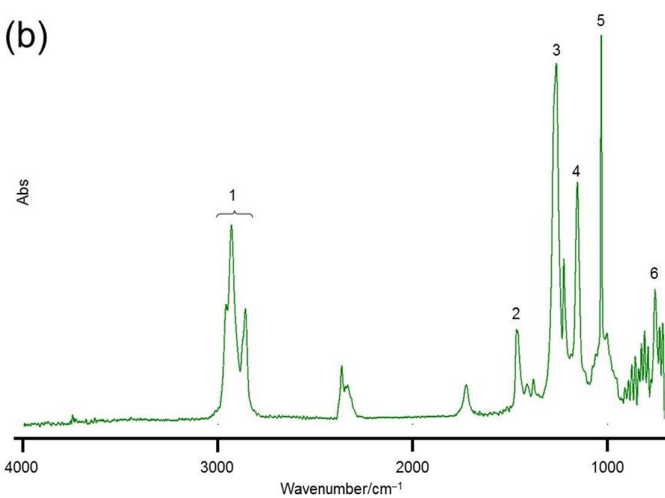

|   | wavenumber/ $\text{cm}^{-1}$ | vibration mode                                                                   |
|---|------------------------------|----------------------------------------------------------------------------------|
| 1 | 2957, 2927, 2855             | $\nu(\text{C-H})$ , $\nu_{\text{as}}(\text{C-H})$ , $\nu_{\text{s}}(\text{C-H})$ |
| 2 | 1465                         | $\delta(\text{C-H})$                                                             |
| 3 | 1260                         | $\nu(\text{C-F})$                                                                |
| 4 | 1153                         | $\nu(\text{SO}_3^-)$                                                             |
| 5 | 1030                         | $\nu(\text{S=O})$                                                                |
| 6 | 754                          | $\nu(\text{C-S})$                                                                |

**Figure S1.** Characterization of IL, (a)  $^1\text{H}$ -NMR and (b) FT-IR spectra.

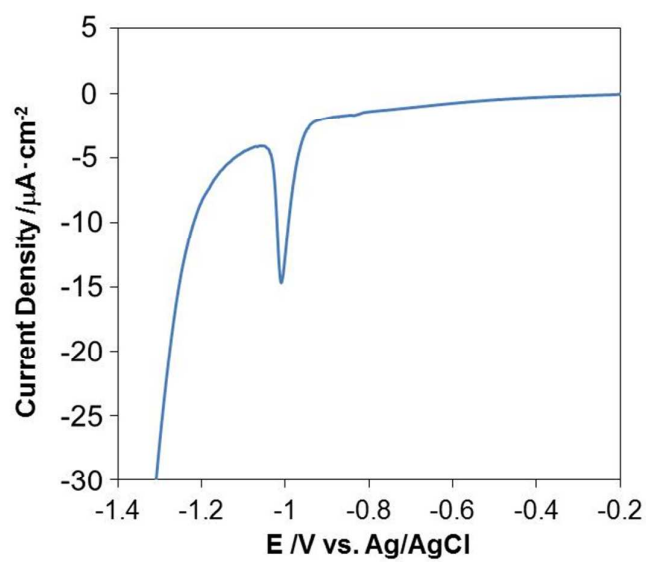

**Figure S2.** Electrochemical desorption of IL modified on the Au(111) electrode.

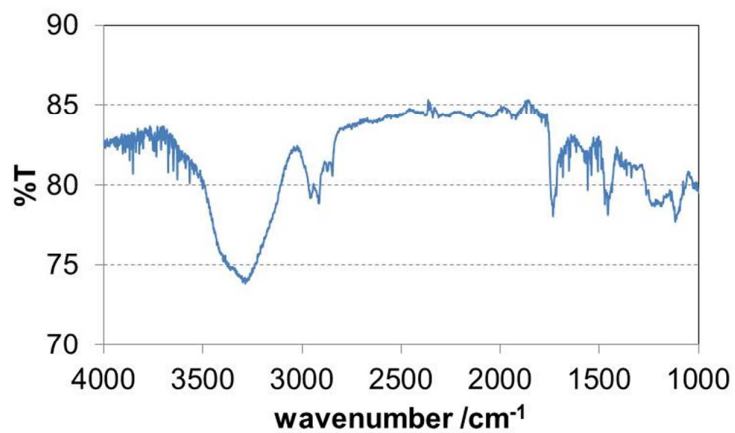

**Figure S3.** FT-IR spectrum of **imidazole@IL/Au** by RAS measurement.

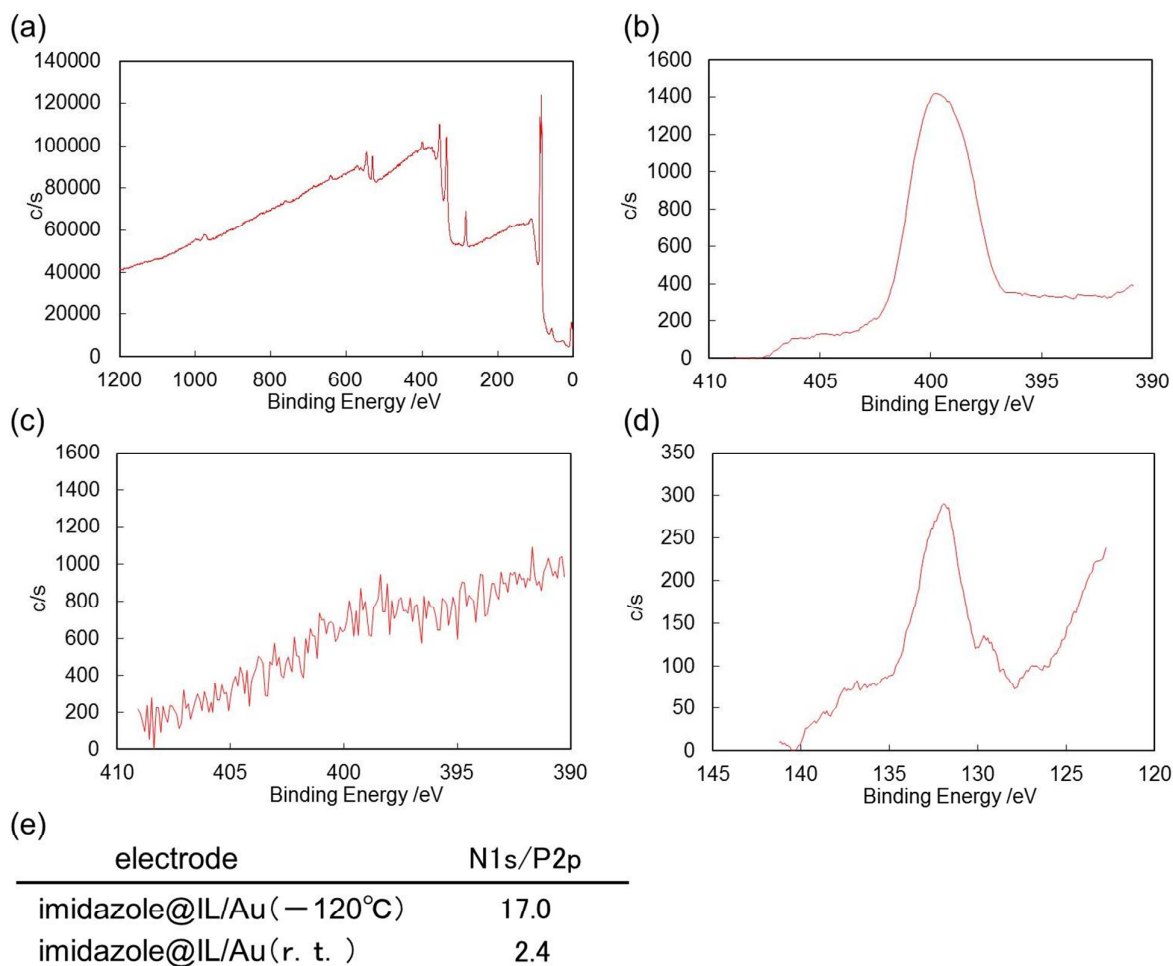

**Figure S4.** XPS analysis of **imidazole@IL/Au**. (a) Wide range spectrum as measured at  $-120\text{ }^{\circ}\text{C}$ , (b) spectrum in the range of 390 - 408 eV as measured at  $-120\text{ }^{\circ}\text{C}$ , (c) spectrum in the range of 390 - 408 eV as measured at room temperature, (d) spectrum in the range of 124 - 140 eV as measured at  $-120\text{ }^{\circ}\text{C}$ , (e) peak intensity ratio of N1s to P2p as performed at each temperature.

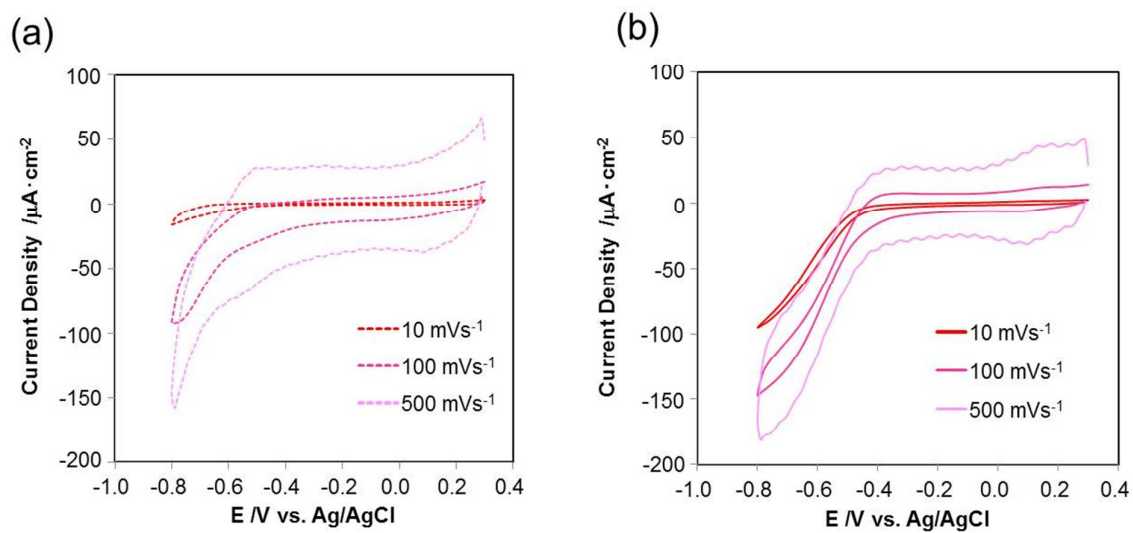

**Figure S5.** CV measurements of **imidazole@IL/Au** under (a) Ar and (b)  $\text{CO}_2$  at various sweep rates.

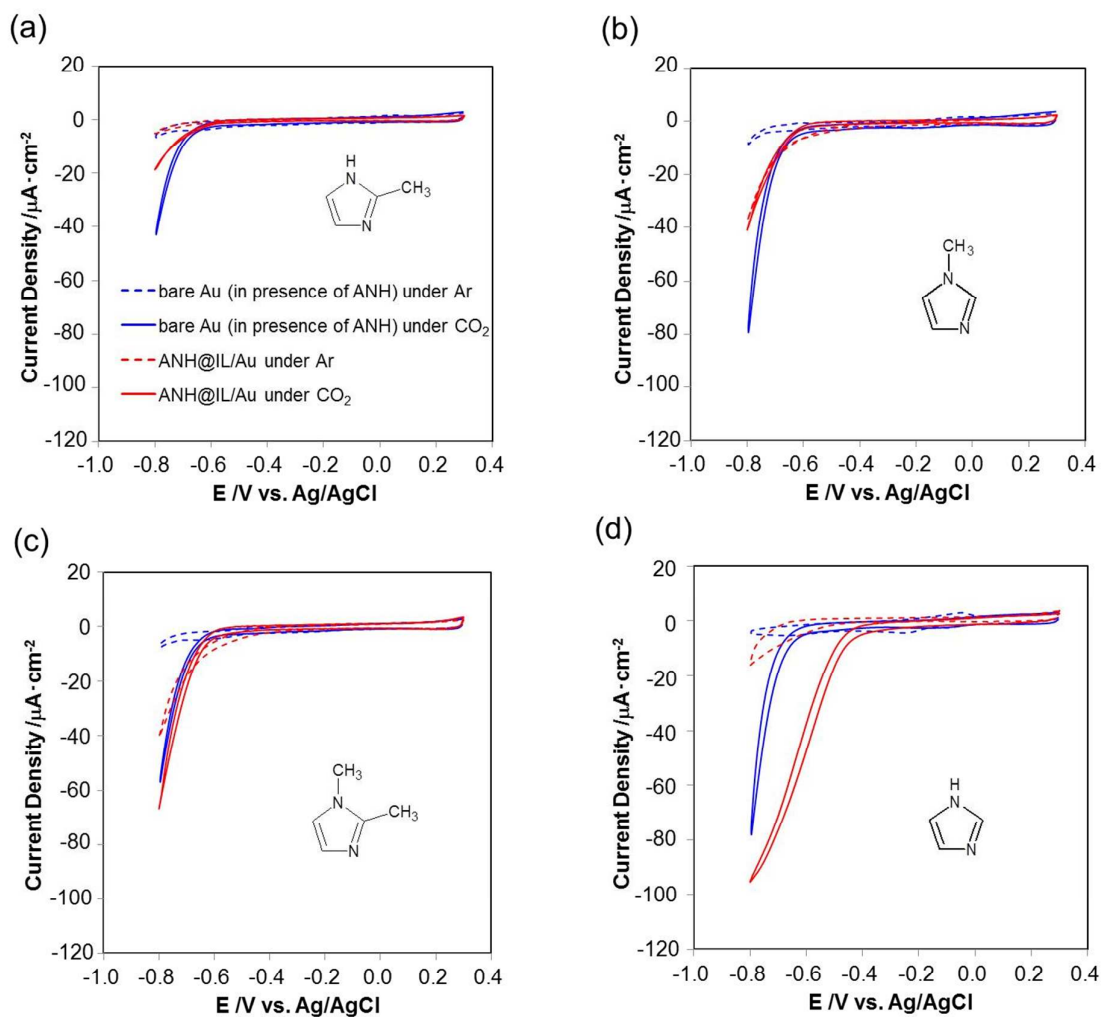

**Figure S6.** CV measurements of the ANH@IL/Au systems containing (a) 2-methylimidazole, (b) 1-methylimidazole, (c) 1,2-dimethylimidazole and (d) imidazole as ANH, as measured with a sweep rate of 10 mV/sec.

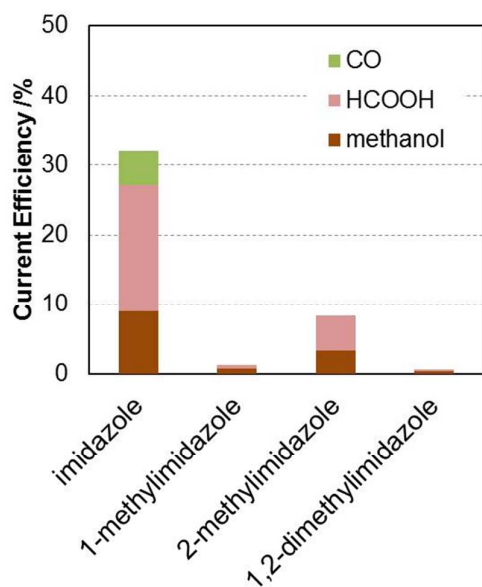

**Figure S7.** Current efficiencies of formate, methanol and CO produced using several different **ANH@IL/Au** electrodes (imidazole, 1-methylimidazole, 2-methylimidazole and 1,2-dimethylimidazole as ANH) as measured at -0.8 V vs. Ag/AgCl.

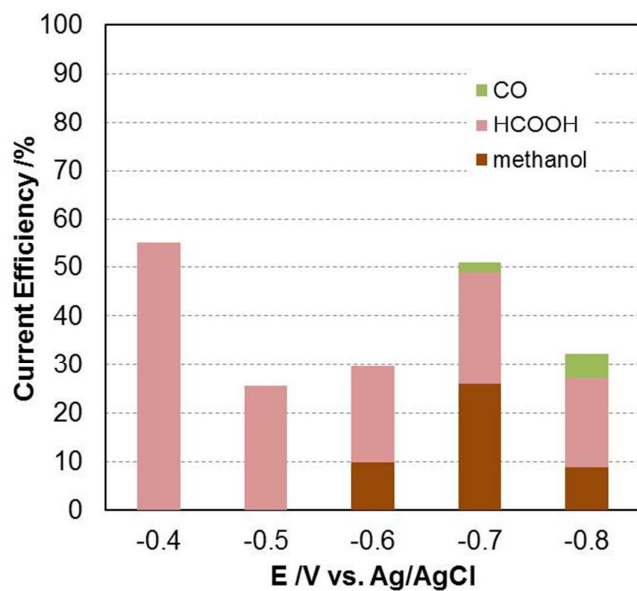

**Figure S8.** Current efficiencies of formate, methanol and CO produced using the **imidazole@IL/Au** electrode as measured at various electrochemical potentials.



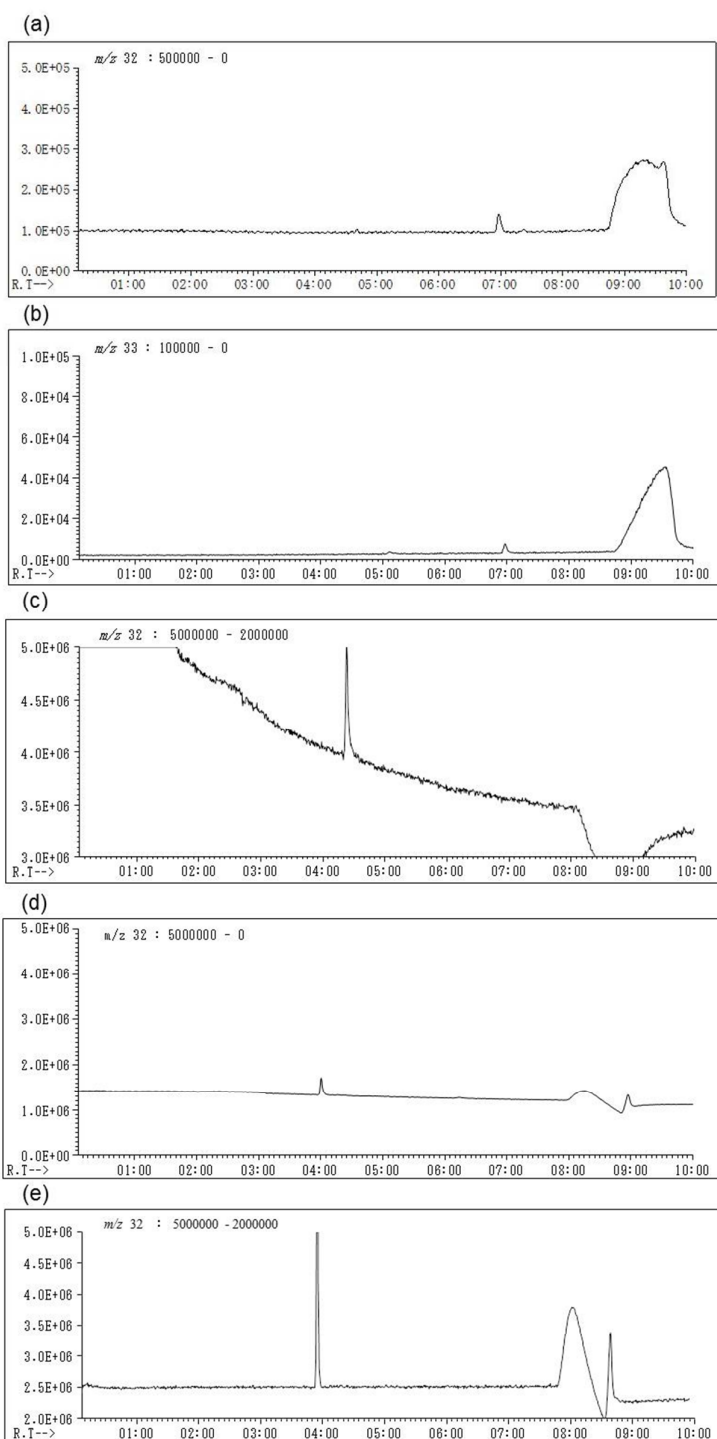

**Figure S9.** GC-MS spectra of (a)  $^{12}\text{CH}_3\text{OH}$  and (b)  $^{13}\text{CH}_3\text{OH}$  as analyzed at a retention time of 7 minutes performed at  $-0.8$  V vs. Ag/AgCl under  $\text{CO}_2$  and  $^{13}\text{CO}_2$ , respectively. (c), (d) and (e) are GC-MS spectra performed using IL/Au electrode, homogeneous system of imidazole at  $-0.8$  V vs. Ag/AgCl or using **imidazole@IL/Au** electrode at  $-0.4$  V vs. Ag/AgCl under  $\text{CO}_2$ . All spectra obtained from (c), (d) and (e) did not give any peaks derived from  $\text{CH}_3\text{OH}$  as analyzed at a retention time of 7 minutes (other peaks of (c), (d) and (e) are attributed to contamination from instruments.).

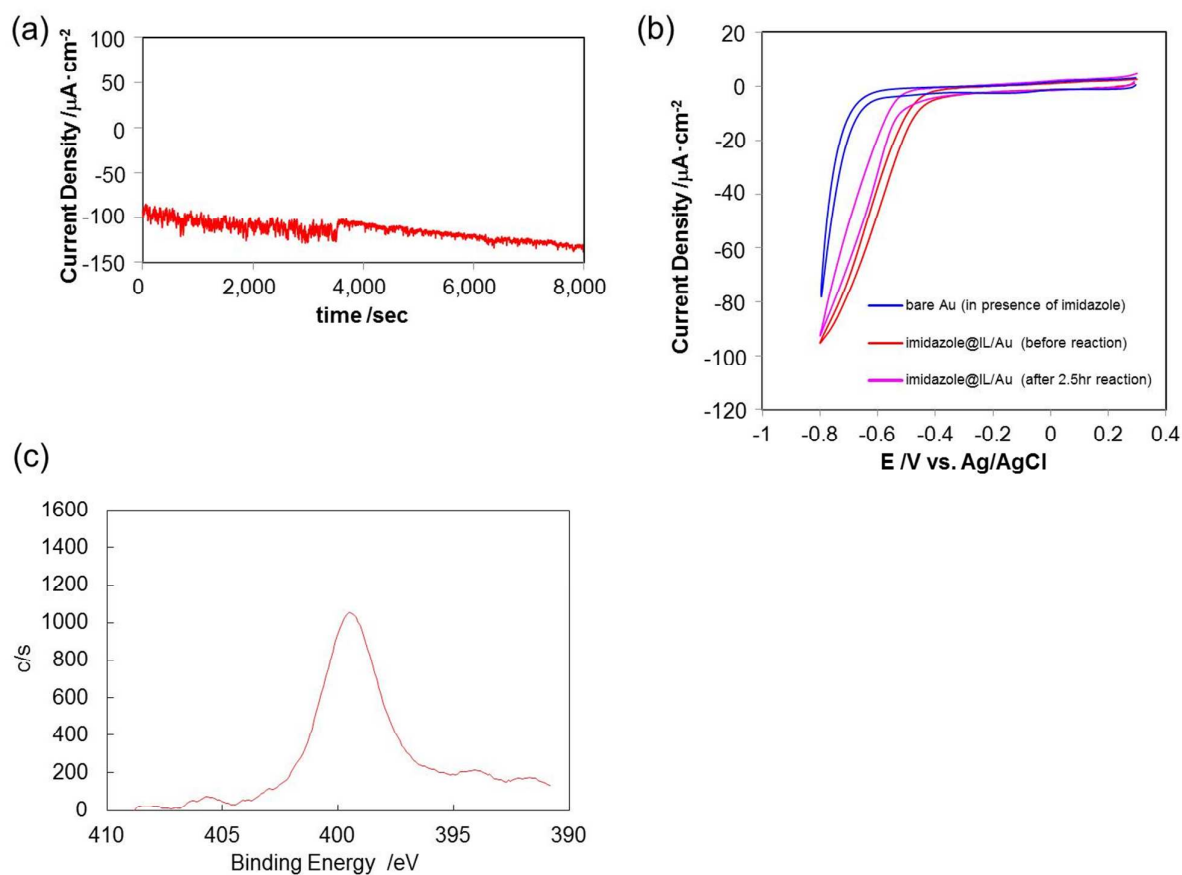

**Figure S10.** (a) Current density vs. time of **imidazole@IL/Au** under  $\text{CO}_2$  at  $-0.8\text{ V}$  vs.  $\text{Ag/AgCl}$ , (b) CV measurement of **imidazole@IL/Au** under  $\text{CO}_2$  before and after electrolysis and (c) XPS analysis of **imidazole@IL/Au** after electrolysis, in the range of  $390 - 408\text{ eV}$  as measured at  $-120\text{ }^\circ\text{C}$ .

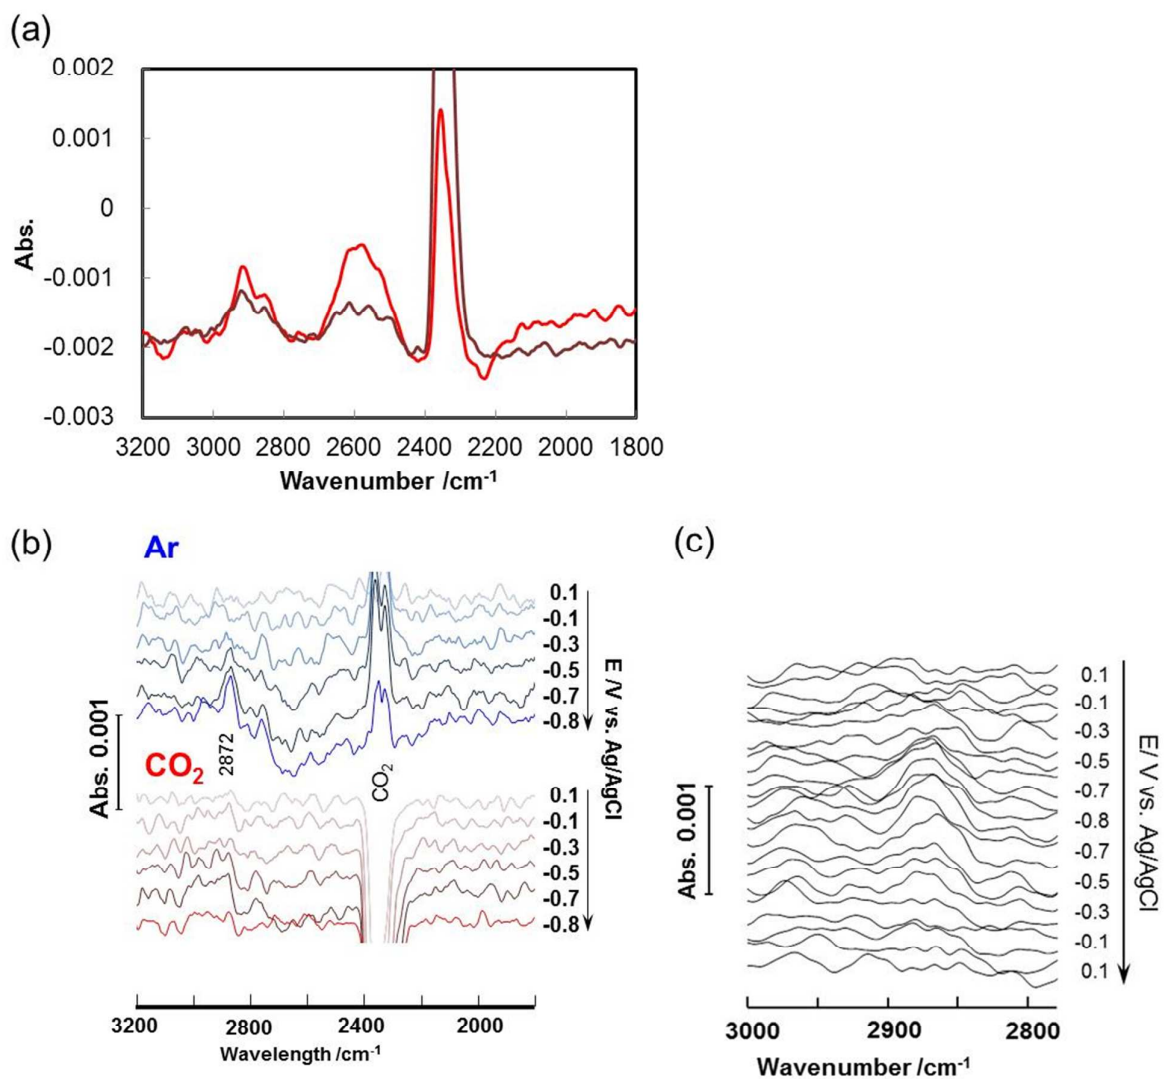

**Figure S11.** Potential dependent *in-situ* ATR-SEIRAS (a) at -0.8 V using the bare Au electrode under CO<sub>2</sub> in D<sub>2</sub>O solutions containing imidazole-d<sub>4</sub> (brown) and imidazole (red), (b) using the IL/Au electrode in 0.1 M NaClO<sub>4</sub> under Ar (blue) and CO<sub>2</sub> (red), (c) using the IL/Au electrode under Ar in the range of 2775 – 3000 cm<sup>-1</sup>.

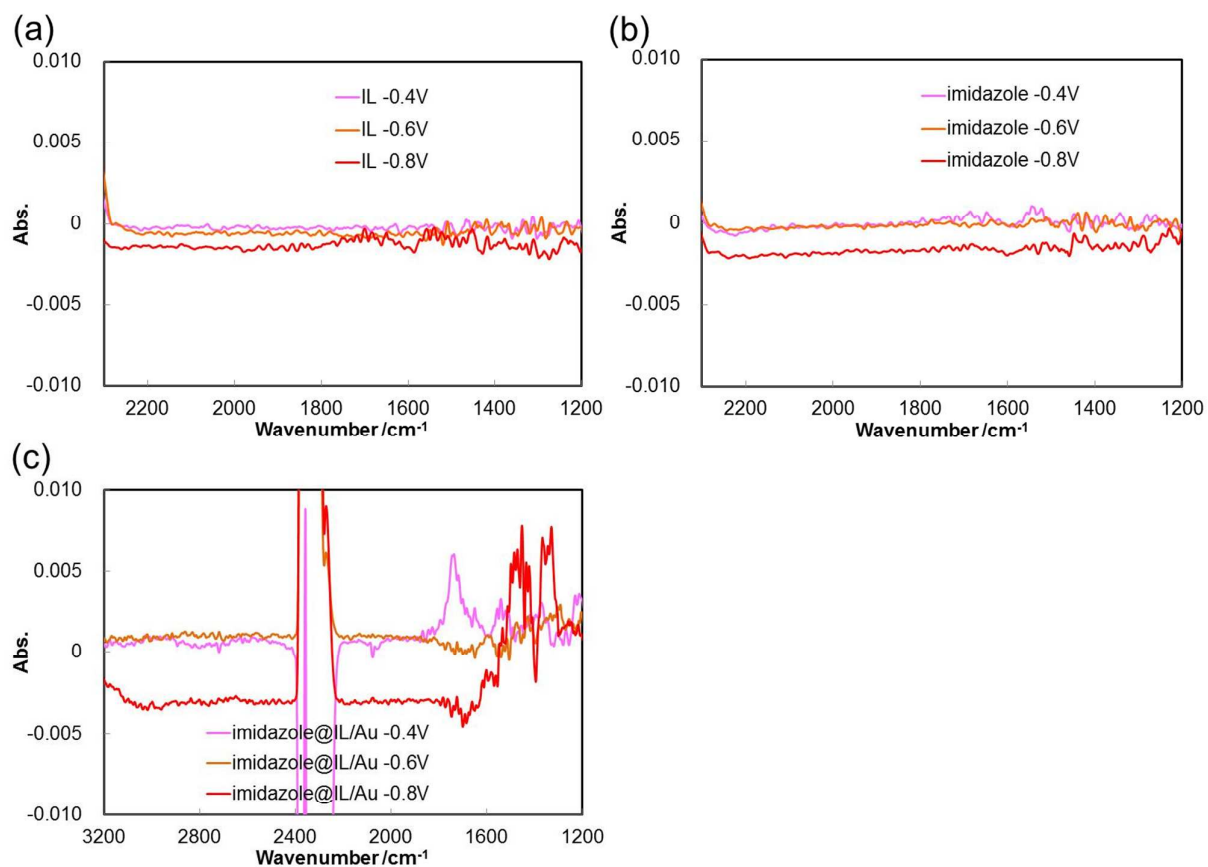

**Figure S12.** SEIRAS spectra coupled with constant potential electrolysis ( $-0.4\text{V}$ ,  $-0.6\text{V}$ ,  $-0.8\text{V}$ ) at 600 sec. (a) using the IL/Au electrode in 0.1 M NaClO<sub>4</sub> D<sub>2</sub>O solution under CO<sub>2</sub>, (b) using the bare Au electrode in 0.1 M NaClO<sub>4</sub> D<sub>2</sub>O solution containing 0.01 M imidazole under CO<sub>2</sub>, and (c) wide range spectra ( $1200\text{-}3200\text{cm}^{-1}$ ) using the **imidazole@IL/Au** electrode in 0.1 M NaClO<sub>4</sub> D<sub>2</sub>O solution under CO<sub>2</sub>.

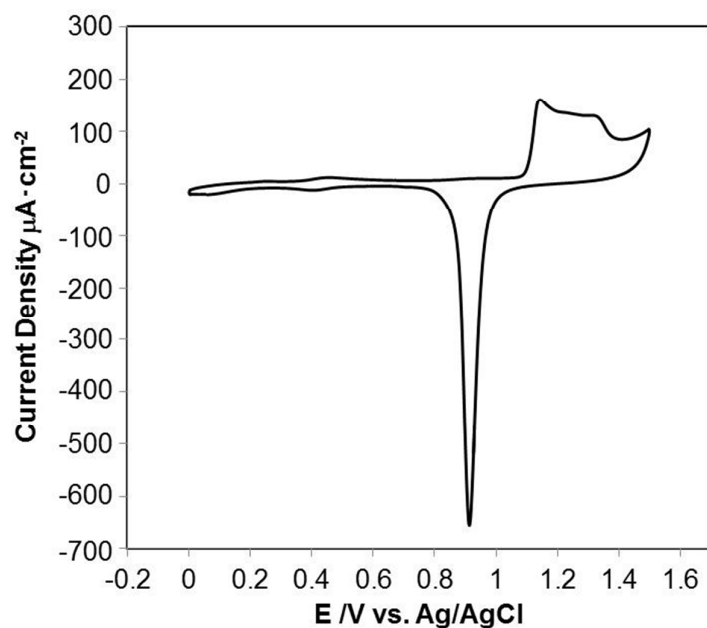

**Figure S13.** Cyclic voltammogram measured with SEIRAS for Au film prepared on a Si ATR prism in 0.1 M  $\text{H}_2\text{SO}_4$  aqueous solution. Scan rate is  $20 \text{ mV s}^{-1}$ . Active surface area was calculated by integrating the charge of Au oxide reduction peak with a theoretical value of  $444 \mu\text{C}/\text{cm}^2$  required for reducing a monolayer of Au oxide. The roughness factor of Au film employed for SEIRAS measurement was estimated as 4.18.

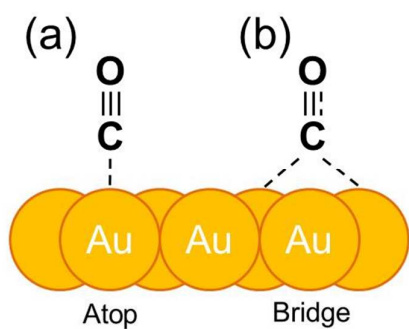

**Scheme S1.** Possible CO adsorption sites on Au, (a) atop and (b) 2-fold bridge.

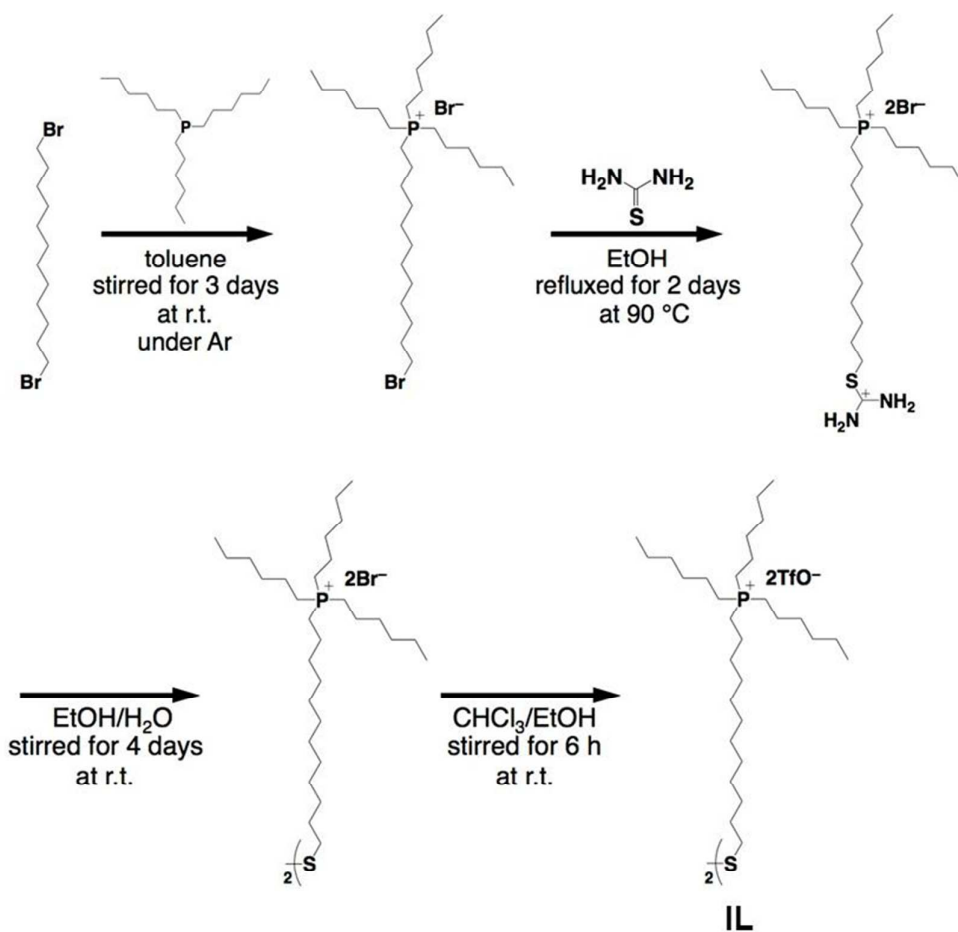

**Scheme S2.** Synthetic scheme of the ionic liquid containing the disulfide group, **IL**.

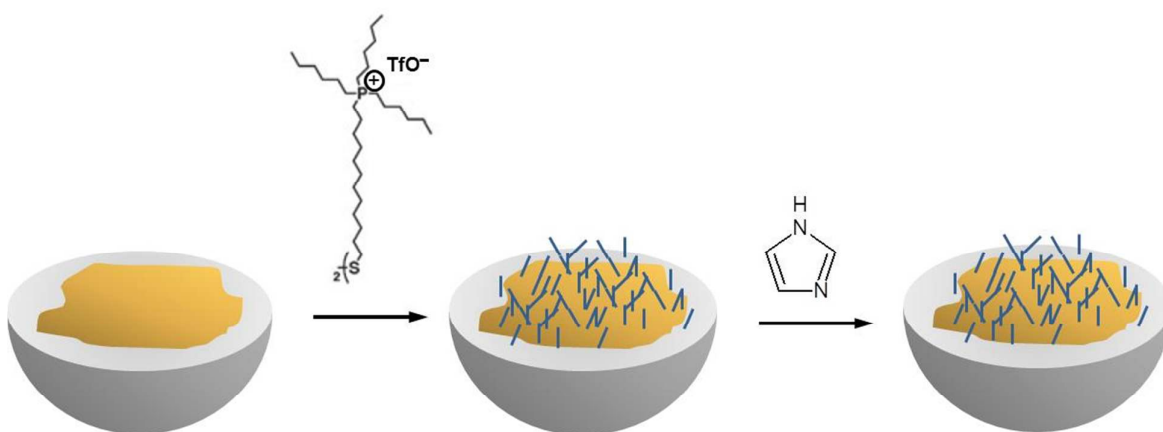

**Scheme S3.** Preparation of the prism for SEIRAS measurements.
